# Supplementary material
Source: HighWire-hosted journal article supplement (https://jitc.bmj.com/content/8/2/e000582)
Supplement: inline-supplementary-material-1 [file inline-supplementary-material-1.pdf]

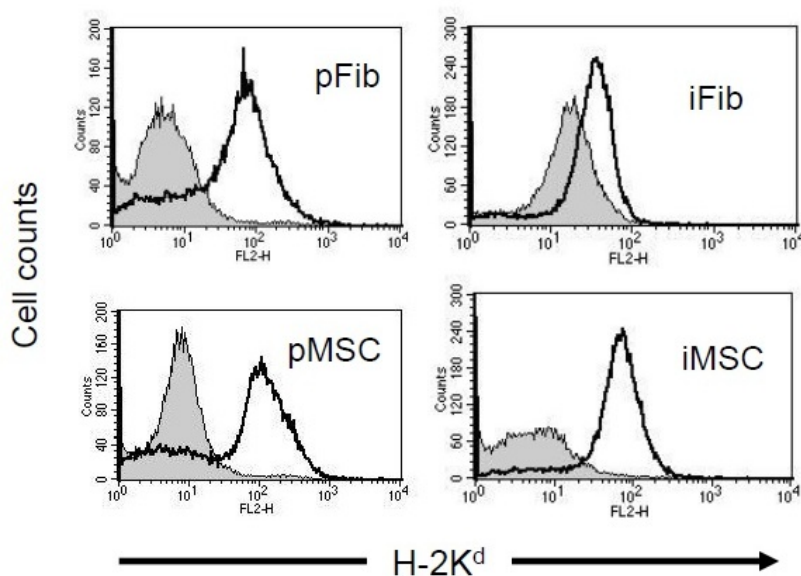

**Supplementary Figure S1. Expression of MHC class I on fibroblasts and MSC.** The expression of H-2K<sup>d</sup> on parental and immortalized fibroblasts and MSC were examined by flow cytometry. Cells were stained with anti-H-2K<sup>d</sup> antibody (bold line) or isotype-matched control (gray background), followed by PE-conjugated anti-rabbit IgG antibody. pFib, parental fibroblasts; iFib, immortalized fibroblasts; pMSC, parental MSC; iMSC, immortalized MSC.
