# Supplementary material
Source: HighWire-hosted journal article supplement (https://jitc.bmj.com/content/8/2/e000582)
Supplement: inline-supplementary-material-2 [file inline-supplementary-material-2.pdf]

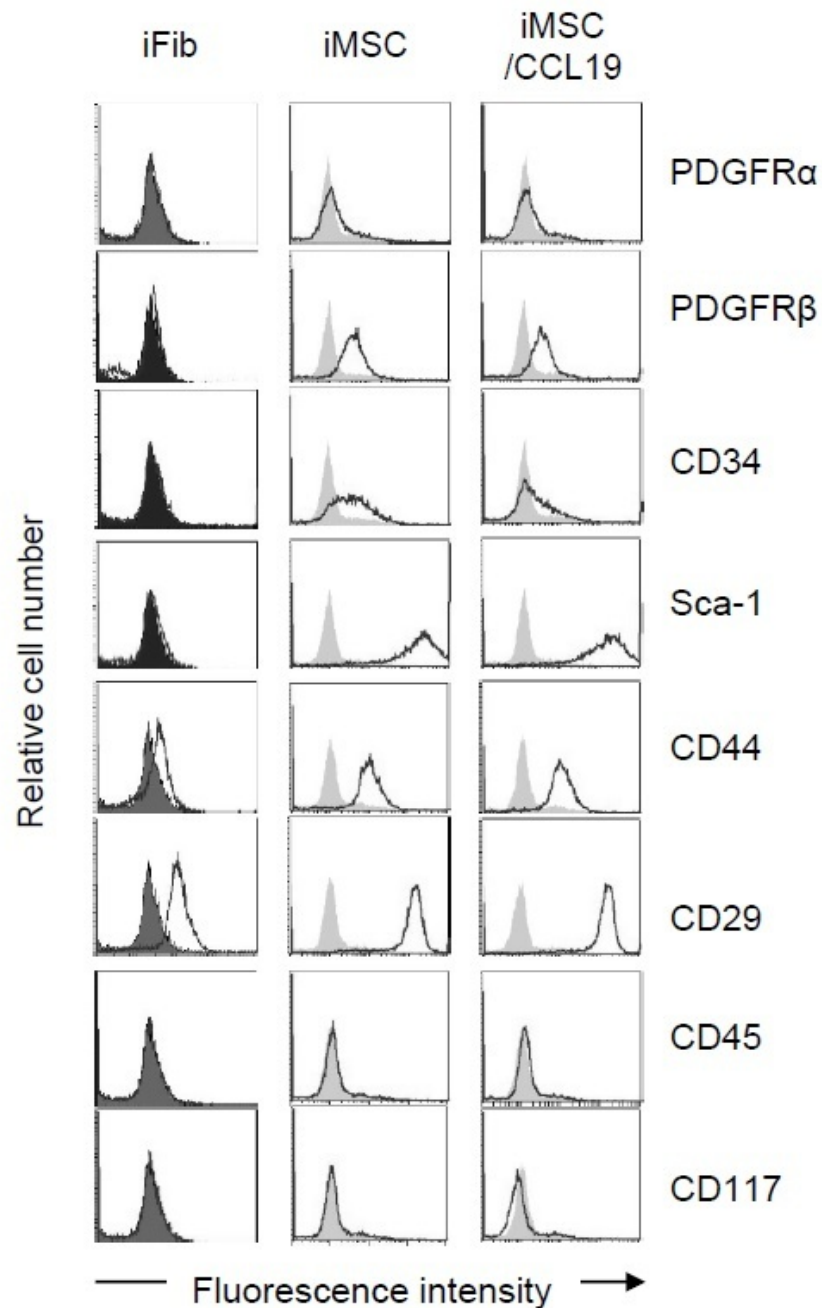

**Supplementary Figure S2. Expression of MSC-related markers on iFib, iMSC, and iMSC/CCL19.** iFibs, iMSCs and iMSCs/CCL19 were stained with the indicated antibodies (bold line). Black or gray backgrounds were controls.
