# Supplementary material
Source: HighWire-hosted journal article supplement (https://jitc.bmj.com/content/8/2/e000582)
Supplement: inline-supplementary-material-3 [file inline-supplementary-material-3.pdf]

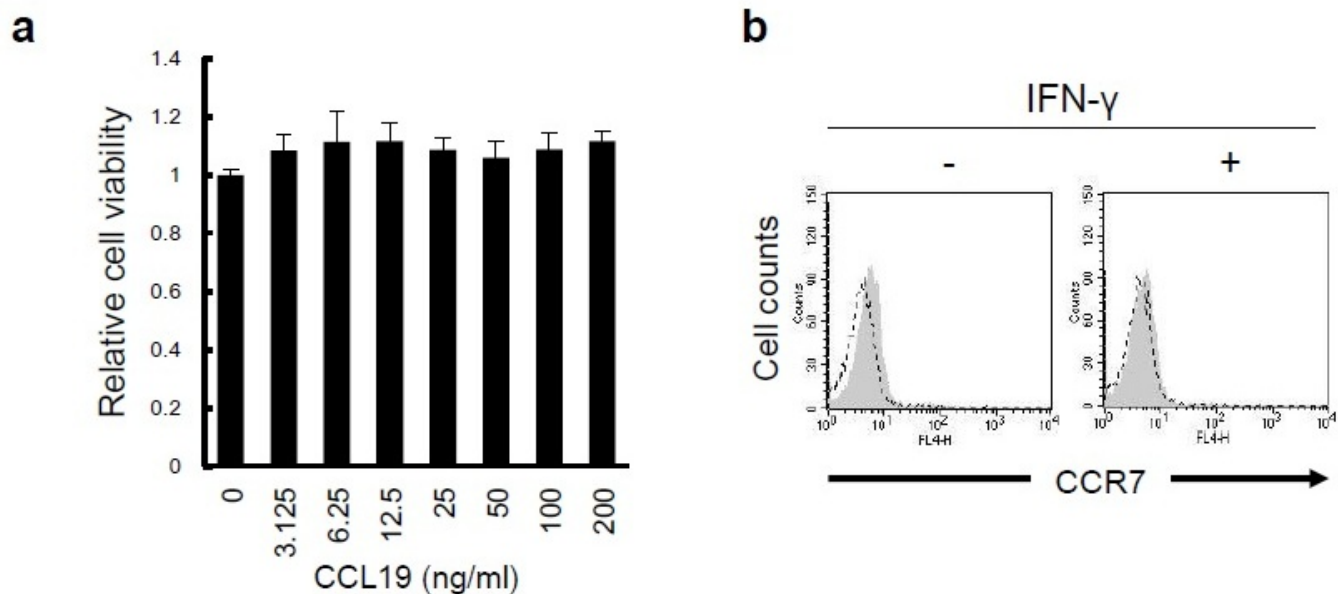

**Supplementary Figure S3. Effect of CCL19 and IFN- $\gamma$  on proliferation and CCR7 expression of CT26 cells.** (a) An effect of CCL19 on cell growth of CT26 was examined by WST-8 assay. CT26 cells were cultured with the indicated doses of recombinant CCL19 48 hr. (b) An Effect of IFN- $\gamma$  on the expression of CCR7 on CT26 cells were examined. CT26 cells were cultured with 50 ng/ml. IFN- $\gamma$  for 24 hr. Thereafter, the expression of CCR7 was examined by flow cytometry.
