# Supplementary material
Source: HighWire-hosted journal article supplement (https://jitc.bmj.com/content/8/2/e000582)
Supplement: inline-supplementary-material-4 [file inline-supplementary-material-4.pdf]

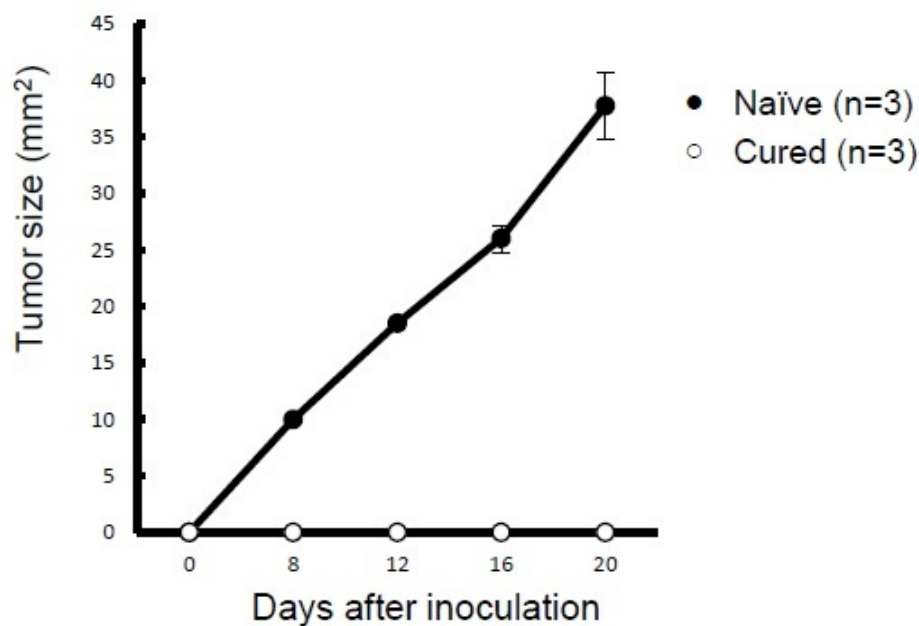

**Supplementary Figure S4. Protective immunity of cured mice against rechallenged CT26 cells.** Two months after the first injection of CT26 cells, cured mice were inoculated s.c with  $2 \times 10^5$  CT26 cells. Naïve BALB/c mice were also inoculated s.c. with  $2 \times 10^5$  CT26 cells. The values and error bars represent the tumor size of mean  $\pm$  s.e.m..
