# Supplementary material
Source: HighWire-hosted journal article supplement (https://jitc.bmj.com/content/8/2/e000582)
Supplement: inline-supplementary-material-5 [file inline-supplementary-material-5.pdf]

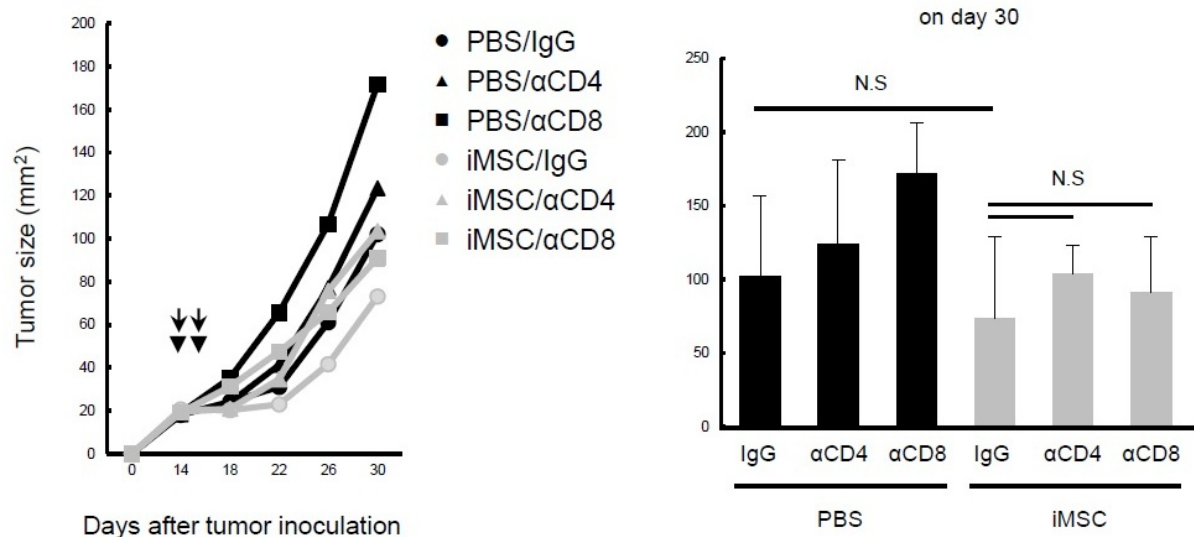

**Supplementary Figure S5. Local injection of iMSC does not suppress the tumor growth.** CT26 tumor-bearing mice were received i.t. injection with PBS or  $5 \times 10^5$  iMSC (arrowheads) and i.p. injection with 100ug control IgG, anti-CD4 or anti-CD8 antibody on days 14 and 16 (arrows) after tumor inoculation. The average of tumor size (left) and the mean tumor size on day 30 (right) were shown. N.S, not significant by Tukey-Kramer test (ANOVA).  $n=5$ , respectively.
