# Supplementary material
Source: HighWire-hosted journal article supplement (https://jitc.bmj.com/content/8/2/e000582)
Supplement: inline-supplementary-material-6 [file inline-supplementary-material-6.pdf]

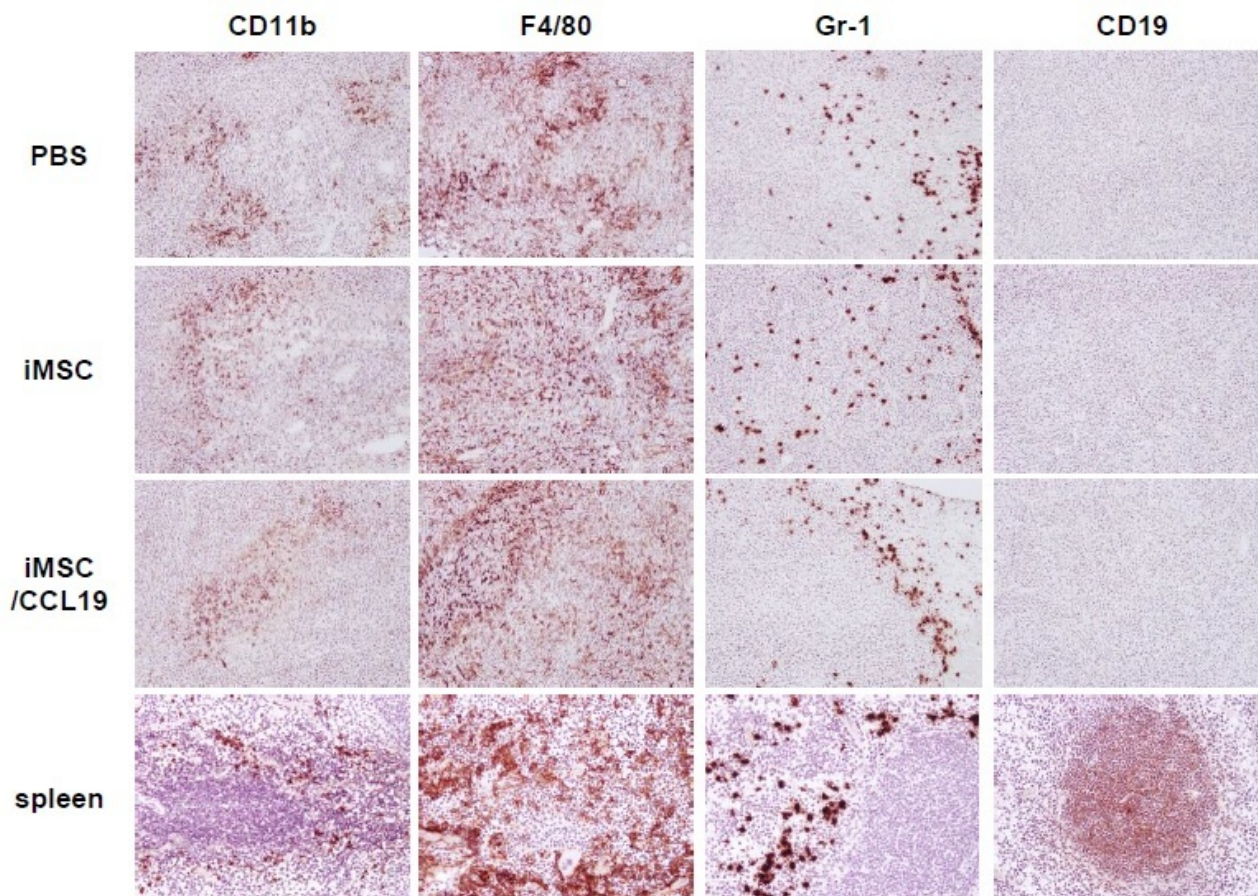

**Supplementary Figure S6. No apparent difference of immune cell infiltration in tumors.** PBS, iMSC or iMSC/CCL19 were injected i.t. on days 14 and 16 after tumor inoculation. Cryosections of the tumor were prepared 17 days after tumor inoculation and stained with anti-CD11b, anti-F4/80, anti-Gr-1, and anti-CD119 antibodies. Representative pictures of tumor were shown. Cryosections of spleen were stained with indicated antibodies as control.
