# Supplementary material
Source: HighWire-hosted journal article supplement (https://jitc.bmj.com/content/8/2/e000582)
Supplement: inline-supplementary-material-8 [file inline-supplementary-material-8.pdf]

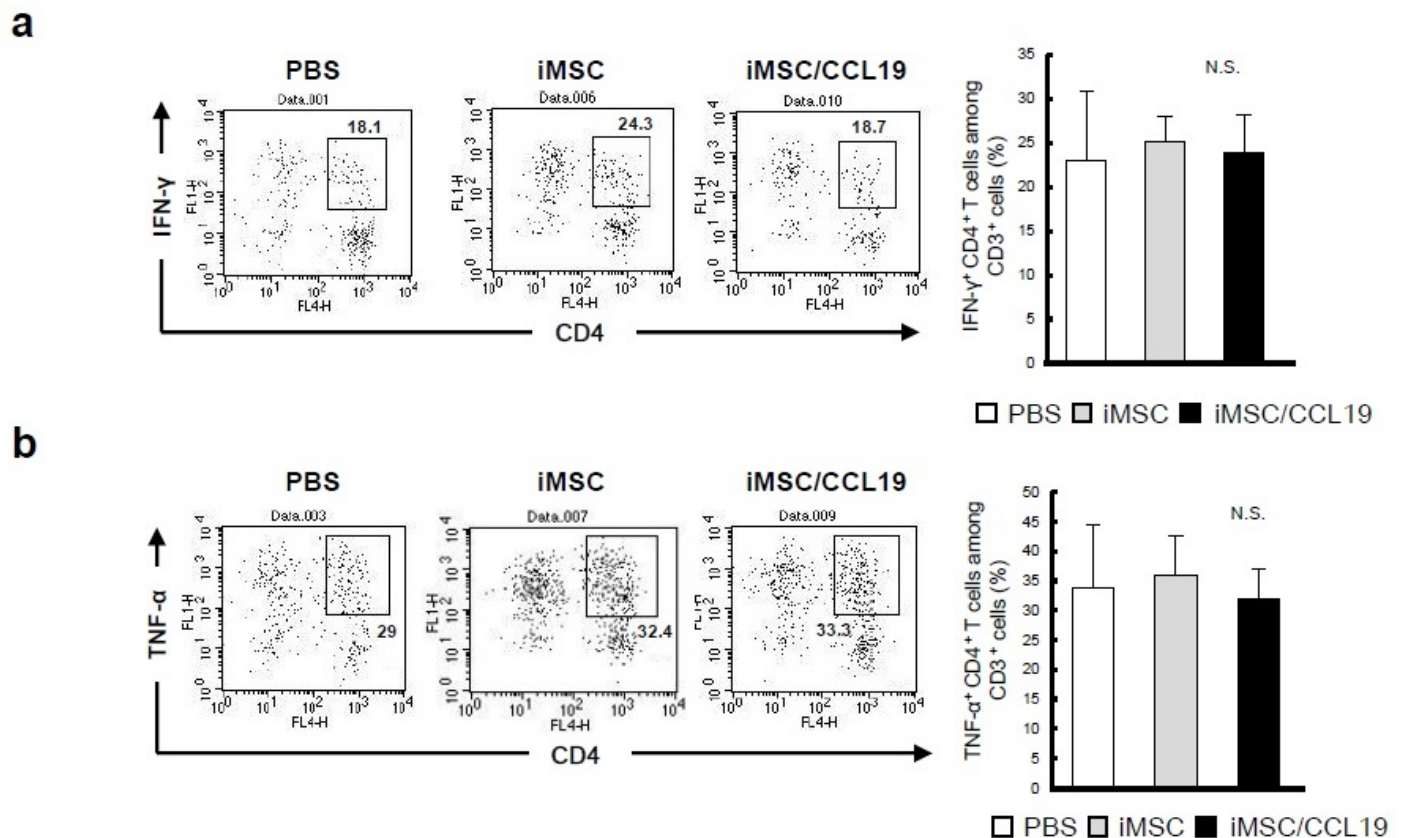

**Supplementary Figure S8. Anti-tumor effect by local injection of iMSC/CCL19 are not related IFN- $\gamma$ <sup>+</sup> and TNF- $\alpha$ <sup>+</sup> CD4<sup>+</sup> T cells in tumor site.**

iMSC or iMSC/CCL19 were injected i.t. on days 14 and 16 after tumor inoculation. Tumor cells were collected 17 days after tumor inoculation, and tumor-infiltrating immune cells were analyzed by flow cytometry. The percentage of IFN- $\gamma$ <sup>+</sup> CD4<sup>+</sup> T cells **(a)** and TNF- $\alpha$ <sup>+</sup> CD4<sup>+</sup> T cells **(b)** among CD3<sup>+</sup> T cells are shown. N.S., not significant.
