# Supplementary material
Source: HighWire-hosted journal article supplement (https://jitc.bmj.com/content/8/2/e000582)
Supplement: inline-supplementary-material-9 [file inline-supplementary-material-9.pdf]

**a**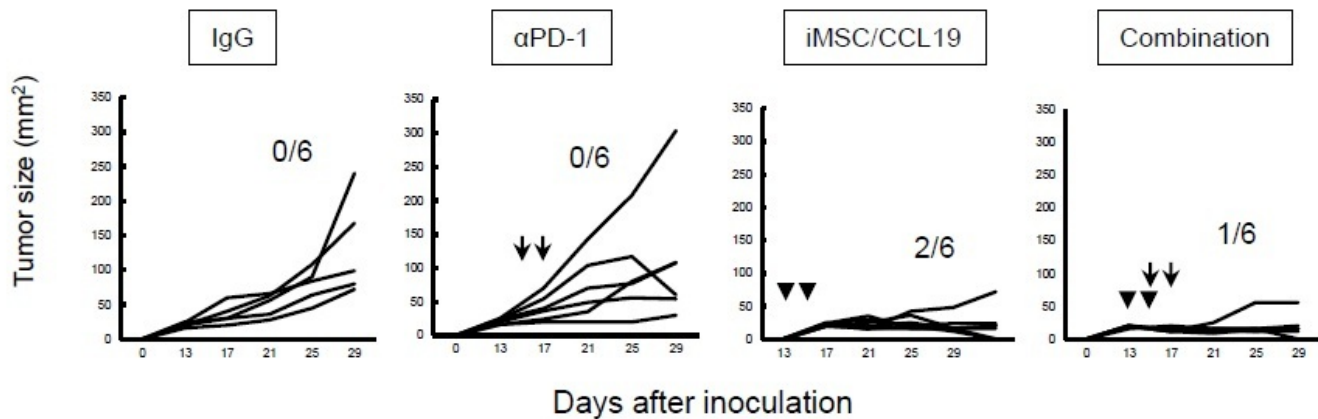**b**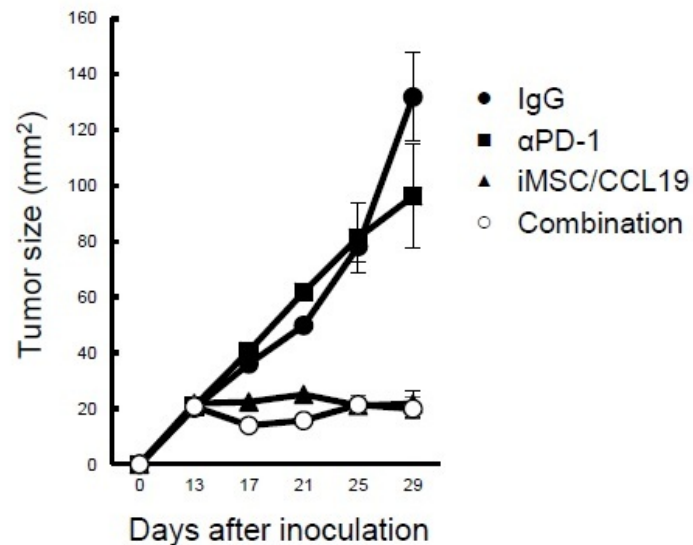

**Supplementary Figure S9. No augmenting effect of the local injection of MSC/CCL19 on the antitumor effect induced by anti-PD-1 blockade therapy.** CT26-bearing mice were i.t. injected with iMSC/CCL19 on days 13 and 15 days (arrowheads). Anti-PD-1 (100 μg) or control IgG (100 μg) antibody were i.p. injected on days 15 and 17 (arrows). (a) The lines represent the tumor growth of each mice. The number represents cured mice/total mice. (b) The means ± s.e.m. of each growth are shown.
